# Supplementary material
Source: Springer Nature journal article supplement (https://www.springermedizin.de/resource/supplementary/12916_2009_247_MOESM2_ESM.pdf/9599480)

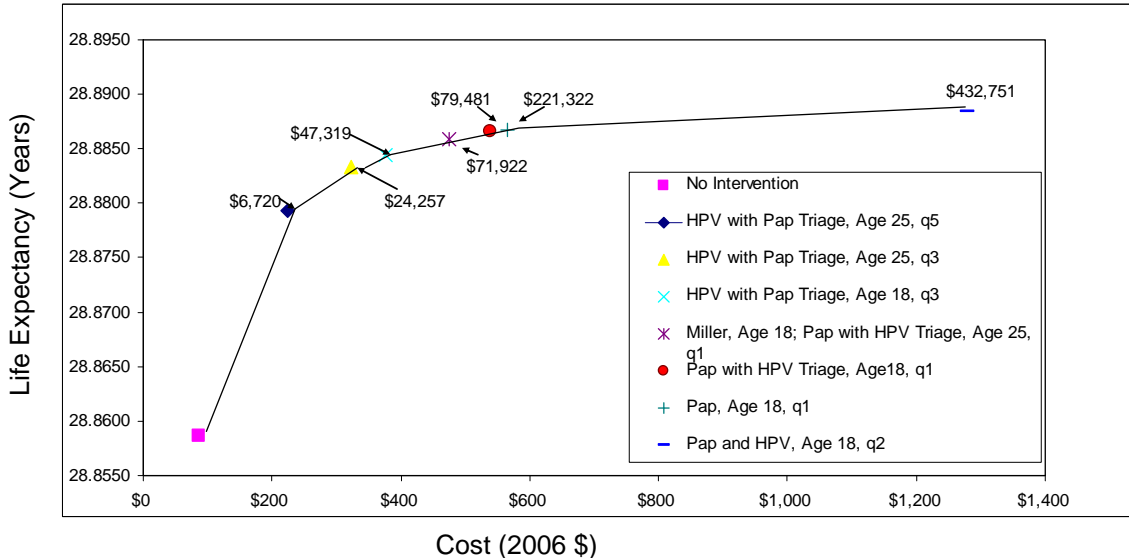

Efficiency Curve for Canada

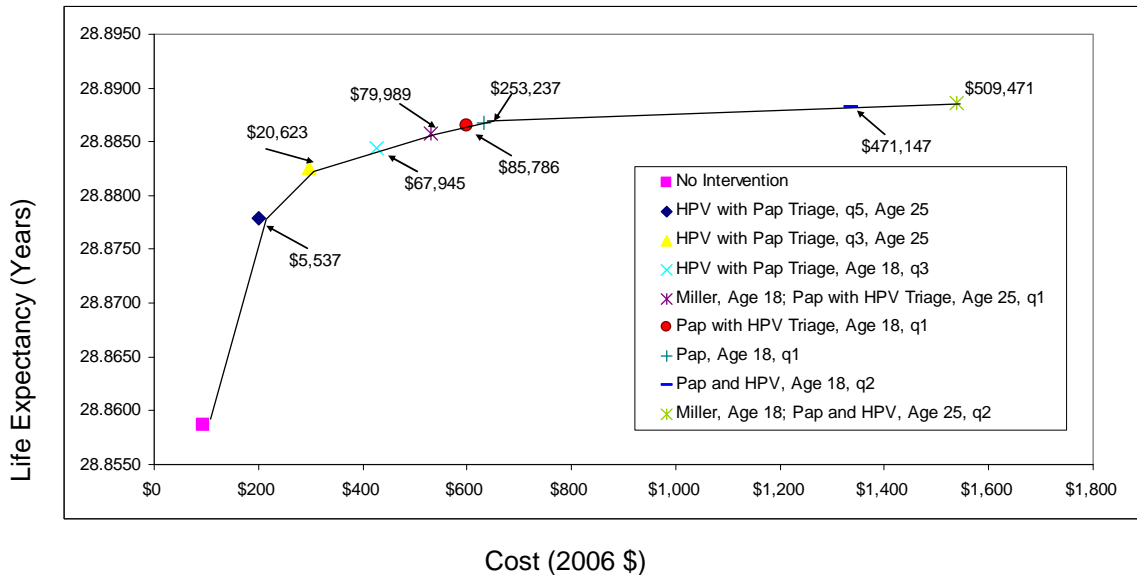

Efficiency curve for Alberta

Supplement: MOESM2 [file 9599480]
